# Supplementary material for: Development of a genome-editing CRISPR/Cas9 system in thermophilic fungal Myceliophthora species and its application to hyper-cellulase production strain engineering
Source: PubMed Central journal article supplement (PMC5209885; doi:10.1186/s13068-016-0693-9), 2017-01-03

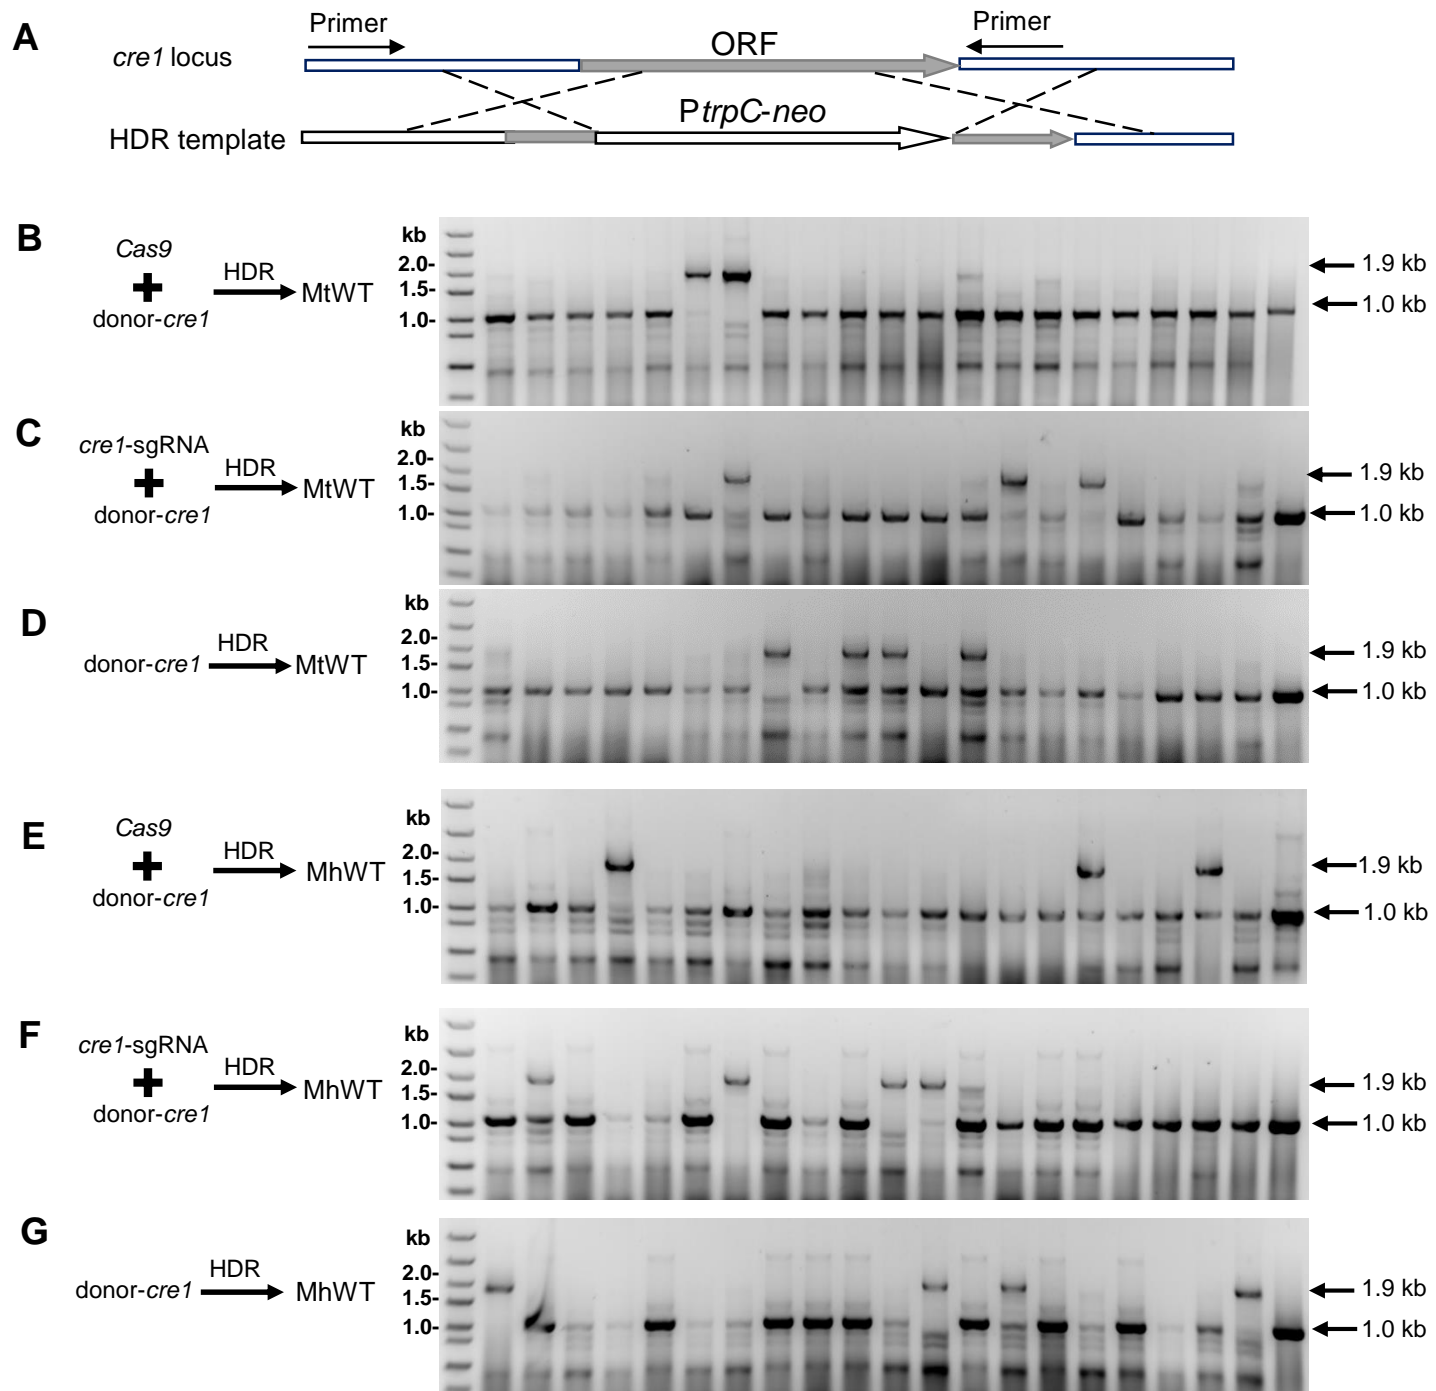

Supplement: 13068_2016_693_MOESM2_ESM.pdf [file 13068_2016_693_MOESM2_ESM.pdf]
