# Supplementary material for: Development of a genome-editing CRISPR/Cas9 system in thermophilic fungal Myceliophthora species and its application to hyper-cellulase production strain engineering
Source: PubMed Central journal article supplement (PMC5209885; doi:10.1186/s13068-016-0693-9), 2017-01-03
Supplement: 13068_2016_693_MOESM7_ESM.pdf [file 13068_2016_693_MOESM7_ESM.pdf]

**Additional file 1: Supplementary Table S1.** List of PCR primers used in this study.

| Construction of Cas9 expressing vectors         |             |                                                                                           |
|-------------------------------------------------|-------------|-------------------------------------------------------------------------------------------|
| Cloning of Cas9                                 | Cas9-F      | GCCAGTTTCGTTCTTCAGAAAGCTTATGGACTACAAGGACCATGATGGCG                                        |
| Cloning of Cas9                                 | Cas9-R      | TGATGATTTACAGTAACGTTAAGTGGATCCTCATCACTCATCTTCTGTTTTGGCAC                                  |
| Cloning of <i>tef1</i> promoter                 | Ptef1-F1    | CTAGGCCACCATGTTGGGCCGCGCGCCGAATTCTCTCCGAGGTTTCGACATCA                                     |
| Cloning of <i>tef1</i> promoter                 | Ptef1-R1    | CGCCATCATGGTCCTGTAGTCCATAAGCTTCTGAAGAACGAAACTGGC                                          |
| Cloning of <i>TprC</i> terminator               | TprC-F      | GTGCCAAAACAGAAAGATGAGTGATGAGGATCCACTTAACGTTACTGAAATCATCA                                  |
| Cloning of <i>TprC</i> terminator               | TprC-R      | TCCTGCCCGTCACAGAGATTTGACCATGGGAGCTCCCTCTAAACAAGTGACCTG                                    |
| Cloning of GFP                                  | GFP-F       | TCTCTCCAGCTCGGCGGCGACGAATTCATGGTGAGCAAGGGCGAGGAGCTGTTC                                    |
| Cloning of GFP                                  | GFP-R       | TGATGATTTACAGTAACGTTAAGTGGATCCTTACTCATCTTCTGTTTTGGCACGTTTCCTC<br>GGAGGCTTGACAGCTCGTCCATGC |
| Construction of sgRNA expressing plasmids       |             |                                                                                           |
| Cloning of U6 promoter                          | U6p-F       | AGGATCGGTGGAGTGAAGTTCGGAA                                                                 |
| Cloning of U6 promoter                          | U6p-amdS-R  | CTAAAACGACCTCCATGCTGTTCCGCCGAGGAAAGAAAGAAAAGAAGAG                                         |
| Cloning of U6 promoter                          | U6p-cre1-R  | CTAAAACCTGCAGACTTTGCGCGTTGCGAGGAAAGAAAGAAAAGAAGAG                                         |
| Cloning of U6 promoter                          | U6p-res1-R  | CTAAAACGGTACGAGGGCTCATAGGGCGAGGAAAGAAAGAAAAGAAGAG                                         |
| Cloning of U6 promoter                          | U6p-gh1-1-R | CTAAAACGGGATGGCGCAGAATGTGTCGAGGAAAGAAAGAAAAGAAGAG                                         |
| Cloning of U6 promoter                          | U6p-alp1-R  | CTAAAACCTGAACTGCCGCGGTAGACGAGGAAAGAAAGAAAAGAAGAG                                          |
| <i>amdS</i> -gRNA 5'                            | g-amdS-F    | TCCTCGCGAACAGCATGGAGGGTCTTTTAGAGCTAGAATAGCAAGTT                                           |
| <i>cre1</i> -gRNA 5'                            | g-cre1-R    | TCCTCGCAACGCGCAAAGTCTGCAGGTTTTAGAGCTAGAATAGCAAGTT                                         |
| <i>res1</i> -gRNA 5'                            | g-res1-R    | TCCTCGCCTATGAGCCCTCGTACCCTTTAGAGCTAGAATAGCAAGTT                                           |
| <i>gh1-1</i> -gRNA 5'                           | g-gh1-1-R   | TCCTCGACACATTCTGCATCCCGTTTTAGAGCTAGAATAGCAAGTT                                            |
| <i>alp-1</i> -gRNA 5'                           | g-alp1-R    | TCCTCGTCTACCGCGCAAGTTCAGGTTTTAGAGCTAGAATAGCAAGTT                                          |
| gRNA 3'                                         | gRNA-R      | AAAAAAGCACCGACTCGGTGCCACTT                                                                |
| Construction of <i>amdS</i> -expression strains |             |                                                                                           |
| Cloning of <i>tef</i> promoter                  | Ptef1-F2    | CCGGAATTCAAAAAAAAGAGAGATGAGTGGGC                                                          |
| Cloning of <i>tef</i> promoter                  | Ptef1-R2    | CCAGTCTTCCAGATTGAGGCATCTGAAGAACGAAACTGGCGACTTG                                            |
| Cloning of <i>amdS</i>                          | amdS-F      | CAAGTCGCCAGTTTCGTTCTTCAAGATGCCTCAATCTGGGAAGAACTGG                                         |
| Cloning of <i>amdS</i>                          | amdS-R      | CCCAAGCTTGCCATCCAGAGTCACCTGTGGCAGC                                                        |
| Donor DNA construction                          |             |                                                                                           |
| <i>cre1</i> -upstream                           | cre1-5'-F   | TTGGGCCCGCGCGCCGAATTCGCGGGATCCACCGGGTAAAGTACTCTGTAAGTT                                    |
| <i>cre1</i> -upstream                           | cre1-5'-R   | GCTCCTCAATATCAGTTAACGTCGTATGTCACCCCTCCCAAGCGGAGTT                                         |
| Cloning of PtrpC-neo                            | neo-cre1-F  | AACTCCGCTTGGGAGGGTGGACATACGACGTTAACTGATATTGAAGGAGC                                        |
| Cloning of PtrpC-neo                            | neo-cre1-R  | AAGCGTTTGCTACACCCGGGAACTTCAGAAGAACTCGTCAAGAAGGCGA                                         |
| <i>cre1</i> -downstream                         | cre1-3'-F   | TCGCCTTCTGACGAGTCTTCTGAAGTCCCGGGGTGAGCAAACGCTT                                            |
| <i>cre1</i> -downstream                         | cre1-3'-R   | CAGATCTACCATGGTGGACTCCTCTTAAAGCTTTGGGGTGTGGTCCGGCGTGGGGAC                                 |
| <i>res1</i> -upstream                           | res1-5'-F   | TTGGGCCCGCGCGCCGAATTCGCGGGATCCAACCAACCTCCTTCGACTTTCGGG                                    |
| <i>res1</i> -upstream                           | res1-5'-R   | GCTCCTCAATATCAGTTAACGTCGACGTCGCGGTGAATTAAGGAGGGAT                                         |
| Cloning of PtrpC-neo                            | neo-res1-F  | ATCCCTCTTAATTCACCCGGACGTCGACGTTAACTGATATTGAAGGAGC                                         |
| Cloning of PtrpC-neo                            | neo-res1-R  | AAGTGGGACTGGTACGAGACAAGACTCAGAAGAACTCGTCAAGAAGGCGA                                        |
| <i>res1</i> -downstream                         | res1-3'-F   | TCGCCTTCTGACGAGTCTTCTGAGTCTTGCTCGTACCAGTCCCACTT                                           |
| <i>res1</i> -downstream                         | res1-3'-R   | CAGATCTACCATGGTGGACTCCTCTTAAAGCTTTGGTGTCTGTAAGGCTTGTGCGTT                                 |
| <i>gh1-1</i> -upstream                          | gh1-1-5'-F  | TTGGGCCCGCGCGCCGAATTCGCGGGATCCACTATCAACAGCCCCCGGATTGCT                                    |

|                                                            |                   |                                                             |
|------------------------------------------------------------|-------------------|-------------------------------------------------------------|
| <i>gh1-1</i> -upstream                                     | gh1-1-5'-R        | GCTCCTCAATATCAGTTAACGTCGTGGAGGGGCCACGGCCATCCTCGTT           |
| Cloning of <i>PtpC</i> -neo                                | neo gh1-1-F       | AACGAGGATGGCCGTGGCCCTCCACGACGTTAACTGATATTGAAGGAGC           |
| Cloning of <i>PtpC</i> -neo                                | neo- gh1-1-R      | TTGCACTTGGGGATGGCCTTGAACATCAGAAGAAGCTCGTCAAGAAGGCGA         |
| <i>gh1-1</i> -downstream                                   | gh1-1-3'-F        | TCGCCTTCTTGACGAGTTCTTCTGATGTTCAAGGCCATCCCCAAGTGCAA          |
| <i>gh1-1</i> -downstream                                   | gh1-1-3'-R        | CAGATCTACCATGGTGGACTCCTCTTAAAGCTTGCAGCCAGAAGGACTGCGTCTCGGG  |
| <i>alp1</i> -upstream                                      | alp1-5'-F         | TTGGGCCCCGGCGCCGAATCCCGGGGATCCCTTCCTAGTCCTCGCAGCAAACCTC     |
| <i>alp1</i> -upstream                                      | alp1-5'-R         | CAAGCTCCGCTCCAAGGCCGACCACCGACGTTAACTGATATTGAAGGAGC          |
| Cloning of <i>PtpC</i> -neo                                | neo-alp1-F        | CAAGCTCCGCTCCAAGGCCGACCACCGACGTTAACTGATATTGAAGGAGC          |
| Cloning of <i>PtpC</i> -neo                                | neo-alp1-R        | TGTCGTAGGTGTAGGTGGTGGAGCCTCAGAAGAAGCTCGTCAAGAAGGCGA         |
| <i>alp1</i> -downstream                                    | alp1-3'-F         | TCGCCTTCTTGACGAGTTCTTCTGAGGCTCCACCACCTACACTACGACA           |
| <i>alp1</i> -downstream                                    | alp1-3'-R         | CAGATCTACCATGGTGGACTCCTCTTAAAGCTTGTAGTTGGCGGCGTTCTGGTTCTCGT |
| <b>PCR analysis of point mutations and gene deletion</b>   |                   |                                                             |
| Sequencing and verifying <i>amdS</i>                       | amdS-in-F         | CTCCCCATCTCTCAAGACCAGC                                      |
| Sequencing and verifying <i>amdS</i>                       | amdS-in-R         | GCTCACTAACCGCCTTGAAACTCTC                                   |
| PCR detecting <i>cre1</i> disruption                       | cre1-out-F        | ATACAGTACCTCTGCACAACCATCC                                   |
| PCR detecting <i>cre1</i> disruption                       | cre1-in-R         | AGTTGGGATTGTTGTGTATCCTCGA                                   |
| PCR detecting <i>res1</i> disruption                       | res1-out-F        | AACCCAGGCATCGTAGATCAGGGC                                    |
| PCR detecting <i>res1</i> disruption                       | res1-in-R         | GCATATGAGCCTTGAGTCCTTGAA                                    |
| PCR detecting <i>gh1-1</i> disruption                      | gh1-1-out-F       | CCTCAGTCTCCGCAATATCGTGCAT                                   |
| PCR detecting <i>gh1-1</i> disruption                      | gh1-1-in-R        | GAAGTAGCCCGTGTGTAGCCAGG                                     |
| PCR detecting <i>alp1</i> disruption                       | alp1-out-F        | TTCTGGCCTGCCCTTTCTTTCAAC                                    |
| PCR detecting <i>alp1</i> disruption                       | alp1-in-R         | GCCCCTTCTCCGAAAGGGGAGGTA                                    |
| <b>Determining <i>PtpC</i>-neo copy numbers by RT-qPCR</b> |                   |                                                             |
| RT-qPCR of <i>actin</i>                                    | actin-RT-F        | AACGCTCTGCCTTCTAC                                           |
| RT-qPCR of <i>actin</i>                                    | actin-RT-R        | GTAACACCATCACCAGAGTC                                        |
| RT-qPCR of <i>PtpC</i> -neo                                | <i>PtpC</i> -RT-F | CATACCTTCTTAAGTTCG                                          |
| RT-qPCR of <i>PtpC</i> -neo                                | neo-RT-R          | GCATCAGAGCAGCCGATT                                          |
