# Supplementary material for: Development of a genome-editing CRISPR/Cas9 system in thermophilic fungal Myceliophthora species and its application to hyper-cellulase production strain engineering
Source: PubMed Central journal article supplement (PMC5209885; doi:10.1186/s13068-016-0693-9), 2017-01-03
Supplement: 13068_2016_693_MOESM8_ESM.pdf [file 13068_2016_693_MOESM8_ESM.pdf]

**Additional file 2:** Nucleotide sequence of the Cas9 expression cassette. Purple letters indicate the *tef* promoter. Blue letters indicate the 3 × FLAG tag. Orange letters indicate the nuclear localization signal. Red letters indicate the *Cas9* gene. Green letters indicate the *GFP* gene. Gray letters indicate the TtrpC terminator.

> Cas9 expression cassette

```
TCCTCCGAGGTTTCGACATCAGGGTTCGTCATAGGGAGTGAAACACCCGCCATGATTCCGTAGCCGCG
CGCGAAGATACGAAGCAGATATTTACGGACATGGCGGAGATACTTGTTTCCCGTACTAAGGTAGTC
ATGTCGGAGACATCTGAACGACAGAGCTGGCCAAGAGAACCGACCAGTTGCCCCAGGACGATCTA
GACAAAAAAAAGAGAGATGAGTGGGCCACTTTTGCCACAACATCGACGGCCCTGCGACCGCCCC
CAGGCAAACAAACAACCGCCGAACAATAACTTTTGTCAATTTTAGGAGGAGCGTTGTATGGATAA
AAACAACATCTCGTTGCTGCAGAATGTGGACTTCAAACCTGCAGAAAATGGGAGGCGGATTTGCAT
GATCGGAGGGTAGTTGACTCACGCCGAGGCTGCAAAATCCGTCTCCTCATTATTCATGAACAACCTC
GTAAGGTTGGGCTGAGCGCCAATGCCTAACGGACCGGGGGCCACAGCGCAACGTCCCCTTAAAG
GCCAGCGTGACATGCCAGTTCCATACCAAGTAGTGGCACCAGAGGCGGCCAATGCTCAGTAAGGGC
AGGGAGGGAGGCTCAAACGATTGGCAAAAAGAGGGGCTTGCCAGTTCAGTTCCTGTGCGAGCGC
GAGAGGGGCAGTTTCAAATCTGGAGGGGTGTGTTGCGCTGGTCTGAAGAGAAAAGAGAAGACTGTA
CTTAATAATTGTTCAAAGAGTCCATCATCGCGTTGCGGACTCCTCTAGCTGTATTTAGAGCCCTATCAT
TACTTGTCGGGTGCGAATCAAATAACCGGGATGCAGCCCTCTGGCGATTTGCATGCGGTTGTGGAGG
AAGTGAAGCCTGAATCGCGGGGCTGGGCGGCAAAGCACGACGTGAAATTCCTGGCGAAATTCGAG
GGCTTGCCCCACCGTGGTTGAAGTTTTTGTGCTGCGTAACCCACCAACCCGCCTTGCCCCCTCCCGC
CTGCCATAAAAACCTTCGACCCCTCCTCAAATCTTCTTCGATTCTTCCTCTTCACTTCCTTCGTCGGC
ATACCTGATTCAAGCAATCACCTGCCACTTTCAAGTGCATATACCATCATCGATACTGGTTCTTGA
CAAGTACATCGTCTCTAACTTTCTTTTTGCAGTTTTCATTAAGCGCAAGTCGCCAGTTTCGTTCTTC
AGAATGGACTACAAGGACCATGATGGCGATTACAAGGACCACGACATCGATTATAAGGATGATGA
TGACAAGCCTCCGAGGAAACGTGCCAAAACAGAAGATGAGATGGATAAGAAGTACTCCATCGGCC
TCGACATCGGCACCAACTCCGTCCGGCTGGGCGGTCATCACCGATGAGTACAAGGTCCCTTCCAAGA
AGTTCAAGGTCCTCGGCAACACCGATCGCCATTCCATCAAGAAGAACCTGATCGGCGCCCTCCTGT
TCGATTCCGGCGAAACCGCCGAGGCCACCCGCCTTAAACGCACCGCCCGTCGCCGCTACACCCGCC
GCAAGAACCGCATCTGCTACCTCCAAGAAATCTTCTCCAACGAGATGGCCAAGGTCGATGATAGC
TTCTTCCACCGCCTCGAAGAGTCCTTCTGGTGAAGAGGATAAGAAGCACGAGCGCCATCCTATC
TTCGGCAACATCGTCGATGAGGTCGCCTACCATGAGAAGTACCCTACCATCTACCATCTCCGCAAG
AAGCTCGTCGATTCCACCGATAAGGCCGATCTCCGCCTCATCTACCTCGCCCTCGCCCATATGATC
AAGTTCCGCGGCCATTTCTCATCGAGGGCGATCTCAACCCTGATAACTCCGATGTCGATAAGCTG
TTCATCCAGCTCGTCCAGACCTACAACCAGCTGTTCGAGGAAAACCTATCAACGCCTCCGGCGTC
GATGCCAAGGCCATCCTCTCCGCTCGCCTCTCCAAGTCTCGCCGCCTTGAGAACCTTATCGCCCAG
CTCCCTGGCGAGAAGAAGAACGGCCTCTTCGGCAACCTGATCGCCCTCTCCCTCGGCCTCACCCCT
AACTTCAAGTCCAACCTTCGATCTCGCCGAGGATGCCAAGCTCCAGCTCTCCAAGGATACCTACGAT
GATGATCTCGATAACCTCCTCGCCAGATCGGCGATCAGTACGCCGATCTGTTCTCGCCGCCAAG
AACCTCTCCGATGCCATCCTCCTCTCCGACATCCTCCGCGTCAACACCGAGATCACCAAGGCCCTC
CTGTCCGCTCCATGATCAAGCGCTACGATGAGCATCATCAGGACCTCACCTGCTCAAGGCCCTC
GTCCGCCAGCAGCTCCCTGAGAAGTACAAAGAGATTTTCTTCGATCAGTCCAAGAACGGCTACGCC
GGCTACATCGATGGCGGCGCTTCCAAGAAGAGTTCTACAAGTTCATCAAGCCTATCCTTGAGAAG
ATGGATGGCACCGAGGAACTCCTCGTCAAGCTCAACCGCGAGGACCTCCTCCGCAAGCAGCGCAC
```

CTTCGATAACGGCTCCATCCCTCATCAAATCCATCTCGGGGAGCTGCATGCCATCTTGCGCCGCCA  
AGAGGATTTCTACCCATTCCTCAAGGATAACCGCGAGAAGATCGAAAAGATTCTCACCTTCCGCAT  
CCCTTACTACGTCGGCCCTCTCGCTCGCGGCAACTCCCGCTTCGCCTGGATGACCCGCAAGTCCGA  
GGAAACCATCACCCCTTGGAACTTCGAGGAAGTCGTCGATAAAGGGCGCCTCCGCCAGTCCTTCAT  
CGAGCGCATGACCAACTTCGATAAGAACCTCCCTAACGAGAAGGTCCCTCCCTAAGCACTCCCTGCT  
CTACGAGTACTTCACCGTCTACAACGAGCTGACCAAGGTCAAGTACGTCACCGAGGGTATGCGCA  
AGCCTGCCTTCCTGTCCGGCGAGCAGAAGAAGGCCATCGTCGATCTGCTGTTCAAGACCAACCGCA  
AGGTACCGTCAAGCAGCTCAAAGAGGATTACTTCAAGAAAATCGAGTGCTTCGATTCCGTCGAG  
ATCAGCGGCGTCGAGGACCGCTTCAACGCCTCCCTCGGAACCTACCATGATCTCCTCAAGATTATC  
AAGGATAAGGATTTCTTCGACAACGAGGAAAACGAGGACATCCTTGAGGACATCGTCCTCACCT  
CACCTCTTCGAGGACCGCGAAATGATCGAGGAACGCCTCAAGACCTACGCCATCTCTTCGATGA  
TAAGGTCATGAAGCAGCTCAAGCGCCGTCGCTACACCGGCTGGGGTCGCCTCTCCCGCAAGCTCAT  
CAACGGCATCCGCGATAAGCAGTCCGGCAAGACTATCCTCGATTTCTCAAGTCCGATGGCTTCGC  
CAACCGCAACTTCATGCAGCTCATCCATGATGATTCCCTCACCTTCAAAGAGGACATCCAGAAGGC  
CCAGGTGAGCGGCCAGGGCGATTCCCTCCATGAGCATATCGCCAACCTCGCCGGCTCCCCTGCCAT  
CAAGAAGGGCATCTCCAGACCGTCAAGGTCGTCGATGAGCTGGTCAAGGTCATGGGCCGCCATA  
AGCCTGAGAACATCGTCATCGAGATGGCCCGCGAGAACCAGACCACCCAGAAGGGCCAGAAGAA  
CTCCCGCGAGCGCATGAAGCGCATCGAGGAAGGCATCAAAGAGCTGGGCAGCCAAATCCTCAAAG  
AGCATCCTGTGCGAGAACACCCAGCTCCAGAACGAGAAGCTCTACCTCTACTACCTCCAGAACGGC  
CGGATATGTACGTCGATCAAGAGCTGGACATCAACCGCCTCTCCGATTACGATGTGCGATCATATC  
GTCCCTCAGTCTTCTGAAGGATGATTCCATCGATAACAAGGTCTCACCCGCTCCGATAAGAAC  
CGCGGCAAGTCCGATAACGTCCCTTCCGAAGAGGTCGTCAAGAAGATGAAGAACTACTGGCGCCA  
GCTCCTCAACGCCAAGCTCATCACCCAGCGCAAGTTCGATAACCTCACCAAGGCCGAGCGCGGTG  
GCCTCTCCGAGCTGGATAAGGCCGGCTTCATCAAGCGCCAGCTCGTCGAAACCCGCCAGATCACC  
AAGCAGTCGCCCAAATCCTCGATTCCCGCATGAACACCAAGTACGATGAGAACGATAAGCTCAT  
CCGCGAAGTCAAGGTCATCACCCCAAGTCCAAGCTCGTCAGCGATTTCCGCAAGGATTTCCAGTT  
CTACAAGGTCCGCGAGATCAACAACCTACCATCATGCCATGATGCCTACCTCAACGCCGTCGTCGG  
CACCGCCCTCATCAAGAAGTACCCCAAGCTCGAATCCGAGTTCGTCTACGGTGATTACAAGGTCTA  
CGATGTCCGCAAGATGATCGCCAAGTCCGAGCAAGAGATCGGCAAGGCTACCGCCAAGTACTTCT  
TCTACTCCAACATCATGAATTTCTTCAAGACCGAAATCACCCCTCGCCAACGGCGAAATCCGCAAGC  
GCCCTCTCATCGAGACTAACGGCGAGACTGGCGAGATCGTCTGGGATAAAGGGCCGCGATTTCCGC  
ACCGTCCGCAAGGTCTCTCCATGCCTCAGGTCAACATCGTCAAGAAAACCGAGGTCCAGACCGG  
CGGCTTCTCAAAGAGTCCATCTCCCAAGCGCAACTCCGATAAGCTGATCGCCCCGAAGAAGG  
ATTGGGACCCTAAGAAGTACGGCGGCTTCGATTCCCTACCGTCGCCTACTCCGTCCTCGTCGTCG  
CCAAGGTCGAGAAGGGCAAGTCCAAGAAGCTCAAGTCCGTCAAAGAGCTGCTCGGCATCACTATT  
ATGGAACGCTCCAGCTTCGAGAAGAACCCTATCGATTTCTTGAGGCCAAGGGCTACAAAGAGGT  
CAAGAAGGACCTCATCATCAAGTCCCAAGTACTCCCTGTTTCGAGCTTGAGAACGGCCGCAAGC  
GCATGCTCGCCTCCGCCGGTGAGCTTCAGAAGGGCAACGAGCTGGCCCTGCCTTCCAAGTACGTCA  
ACTTCTCTACCTCGCCTCCATTACGAGAAGCTCAAGGGCTCCCTGAGGATAACGAGCAGAAGC  
AGCTGTTTCGTCGAGCAGCATAAGCACTACCTCGATGAGATCATCGAGCAGATCAGCGAGTTCTCCA  
AGCGCGTCATCTCGCGGATGCCAACCTCGATAAGGTCTGTCCGCCTACAACAAGCACCGCGATA  
AGCCTATCCGCGAGCAGGCCGAGAACATCATCCATCTCTTACCCTCACCAACCTCGGTGCCCTG  
CCGCCTTCAAGTACTTCGATAACCACCATCGATCGCAAGCGCTACACCTCCACCAAAGAGGTCTGG  
ACGCCACCTCATCCATCAGTCCATCACCGCCTCTACGAAACCCGCATCGATCTCTCCAGCTCG

GCGGCGACCCTCCGAGGAAACGTGCCAAAACAGAAGATGAGTGATGAGGATCCACTTAACGTTAC  
TGAAATCATCAAACAGCTTGACGAATCTGGATATAAGATCGTTGGTGTTCGATGTCAGCTCCGGAGTT  
GAGACAAATGGTGTTCAGGATCTCGATAAGATACGTTTCATTTGTCCAAGCAGCAAAGAGTGCCTTCT  
AGTGATTTAATAGCTCCATGTCAACAAGAATAAAAACGCGTTTTTCGGGTTTACCTCTTCCAGATACAG  
TCATCTGCAATGCATTAATGCATTGACTGCAACCTAGTAACGCCTTACAGGCTCCGGCGAAGAGAAG  
AATAGCTTAGCAGAGCTATTTTCATTTTCGGGAGACGAGATCAAGCAGATCAACGGTCGTCAAGAG  
ACCTACGAGACTGAGGAATCCGCTCTTGGCTCCACGCGACTATATATTTGTCTCTAATTGTACTTTGA  
CATGCTCCTCTTCTTACTCTGATAGCTTACTATGAAAATTCCGTCACCAGCNCCTGGGTTTCGCAAA  
GATAATTGCATGTTTCTTCTTGAACCTCAAGCTACAGGACACACATTCATCGTAGGTATAAACCT  
CGAAATCANTTCCTACTAAGATGGTATACAATAGTAACCATGCATGGTTGCCTAGTGAATGCTCCGTA  
ACACCCAATACGCCGGCCGAAACTTTTTTACAACCTCCTATGAGTCGTTTACCCAGAATGCACAGG  
TACACTTGTTTAGAGG

> Cas9-GFP expression cassette

TCCTCCGAGGTTTCGACATCAGGGTTCGTCATAGGGAGTGAAACACCCGCCATGATTCGGTAGCCGCG  
CGGAAGATACGAAGCAGATATTTACGGACATGGCGGAGATACTTGTTTTCCCGTACTAAGGTAGTC  
ATGTCGGAGACATCTGAACGACAGAGCTGGCCAAGAGAACCAGGTTGCCCCAGGACGATCTA  
GACAAAAAAGAGAGATGAGTGGGCCACTTTTGCCACAACATCGACGGCCCTGCGACCGCCCC  
CAGGCAAACAAACAAACCGCCGAACAATAACTTTTTGTCATTTTAGGAGGAGCGTTGTATGGATAA  
AAACAACATCTCGTTGCTGCAGAATGTGGACTTCAAACCTGCAGAAAATGGGAGGCGGATTTGCAT  
GATCGGAGGGTAGTTGACTCACGCCGAGGCTGCAAATCCGTCCTCCATTATTCATGAACAACCTC  
GTAAGGTTGGGCTGAGCGCAATGCCTAACGACCGGGGGCCACAGCGCAACGTCCCACTTAAAG  
GCCAGCGTGACATGCCAGTTCATACCAAGTAGTGGCACCAGAGGCGCCAATGCTCAGTAAGGGC  
AGGGAGGGAGGCTCAAACGATTGGCAAAAAGAGGGGCTTGCCAGTTCAGTTCCTGTGCGAGCGC  
GAGAGGGGCAGTTTCAAATCTGGAGGGGTGTGTTGCGCTGGTCTGAAGAGAAAGAGAAGACTGTA  
CTTAATAATTGTTCAAAGAGTCCATCATCGCGTTGCGGACTCCTCTAGCTGTATTTAGAGCCCTATCAT  
TACTTGTCCGGTGCGAATCAAATAACCGGGATGCAGCCCTCTGGCGATTTGCATGCGGTTGTGGAGG  
AAGTGAAGCCTGAATCGCGGGGCTGGGCGCAAAGCACGACGTGAAATTCCTGGCGAAATTCGAG  
GGCTTGCCCCACCGTGGTTGAAGTTTTTGTGCTGCGTAACCCACCAACCCGCCTTGCCCCCTCCCGC  
CTGCCATAAAAACCTTCGACCCCTCCTCAAATCTTCTTCGATTCTTCTCTTCACTTCTTTCGTCGGC  
ATACCTGATTCAAGCAATCACCTGCCACTTTCAAGTGCATATACCATCATCGATACTGGTTCTTGA  
CAAGTACATCGTCTCTAACTTTCCTTTTTGCAGTTTTCATTAAGCGCAAGTCGCCAGTTTCGTTCTTC  
AGAATGGACTACAAGGACCATGATGGCGATTACAAGGACCACGACATCGATTATAAGGATGATGA  
TGACAAGCCTCCGAGGAAACGTGCCAAAACAGAAGATGAGATGGATAAGAAGTACTCCATCGGCC  
TCGACATCGGCACCAACTCCGTCGGCTGGGCGGTCATCACCGATGAGTACAAGGTCCCTTCCAAGA  
AGTTCAAGGTCCTCGGCAACACCGATCGCCATTCCATCAAGAAGAACCTGATCGGGCGCCCTCCTGT  
TCGATTCCGGCGAAACCGCCGAGGCCACCCGCCTTAAACGCACCGCCCGTCGCCGCTACACCCGCC  
GCAAGAACCGCATCTGCTACCTCCAAGAAATCTTCTCAACGAGATGGCCAAGGTCGATGATAGC  
TTCTTCCACCGCCTCGAAGAGTCCTTCTGGTCTGAAGAGGATAAGAAGCACGAGCGCCATCCTATC  
TTCGGCAACATCGTCGATGAGGTCGCCTACCATGAGAAGTACCCTACCATCTACCATCTCCGCAAG  
AAGTCGTCGATTCCACCGATAAAGCCGATCTCCGCTCATCTACCTCGCCCTCGCCCATATGATC  
AAGTCCGCGGCCATTTCTCATCGAGGGCGATCTCAACCCTGATAACTCCGATGTCGATAAGCTG  
TTCATCCAGCTCGTCCAGACCTACAACCAGCTGTTTCGAGGAAAACCTATCAACGCCTCCGGCGTC  
GATGCCAAGGCCATCCTCTCCGCTCGCCTCTCCAAGTCTCGCCGCTTGAGAACCCTTATCGCCCAG

CTCCCTGGCGAGAAGAAGAACGGCCTCTTCGGCAACCTGATCGCCCTCTCCCTCGGCCTCACCCCT  
AACTTCAAGTCCAACCTTCGATCTCGCCGAGGATGCCAAGCTCCAGCTCTCCAAGGATACCTACGAT  
GATGATCTCGATAACCTCCTCGCCAGATCGGCGATCAGTACGCCGATCTGTTCCCTCGCCGCCAAG  
AACCTCTCCGATGCCATCCTCCTCTCCGACATCCTCCGCGTCAACACCGAGATCACCAAGGCCCT  
CTGTCCGCCTCCATGATCAAGCGCTACGATGAGCATCATCAGGACCTCACCTGCTCAAGGCCCTC  
GTCCGCCAGCAGCTCCCTGAGAAGTACAAAGAGATTTTCTTCGATCAGTCCAAGAACGGCTACGCC  
GGCTACATCGATGGCGGCGCTTCCAAGAAGAGTTCTACAAGTTCATCAAGCCTATCCTTGAGAAG  
ATGGATGGCACCGAGGAACCTCGTCAAGCTCAACCGCGAGGACCTCCTCCGCAAGCAGCGCAC  
CTTCGATAACGGCTCCATCCCTCATCAAATCCATCTCGGCGAGCTGCATGCCATCTTGCGCCGCCA  
AGAGGATTTCTACCCATTCTCAAGGATAACCGCGAGAAGATCGAAAAGATTCTCACCTTCCGCAT  
CCCTTACTACGTCGGCCCTCTCGCTCGCGGCAACTCCCGCTTCGCCTGGATGACCCGCAAGTCCGA  
GGAAACCATCACCCCTTGGAACCTTCGAGGAAGTCGTCGATAAAGGGCGCCTCCGCCAGTCCTTCAT  
CGAGCGCATGACCAACTTCGATAAGAACCTCCCTAACGAGAAGGTCTCCCTAAGCACTCCCTGCT  
CTACGAGTACTTCACCGTCTACAACGAGCTGACCAAGGTCAAGTACGTCACCGAGGGTATGCGCA  
AGCCTGCCTTCTGTCCGGCGAGCAGAAGAAGGCCATCGTCGATCTGCTGTTCAAGACCAACCGCA  
AGGTCACCGTCAAGCAGCTCAAAGAGGATTACTTCAAGAAAATCGAGTGCTTCGATTCCGTGCGAG  
ATCAGCGGCGTCGAGGACCGCTTCAACGCCTCCCTCGGAACCTACCATGATCTCCTCAAGATTATC  
AAGGATAAGGATTTCTCGACAACGAGGAAAACGAGGACATCCTTGAGGACATCGTCCTCACCCCT  
CACCCCTTTGAGGACCGCGAAATGATCGAGGAACGCCTCAAGACCTACGCCATCTCTTCGATGA  
TAAGGTCATGAAGCAGCTCAAGCGCCGTCGCTACACCGGCTGGGGTGCCTCTCCCGCAAGTCAT  
CAACGGCATCCGCGATAAGCAGTCCGGCAAGACTATCCTCGATTTCTCAAGTCCGATGGCTTCGC  
CAACCGCAACTTCATGCAGCTCATCCATGATGATTCCCTCACCTTCAAAGAGGACATCCAGAAGGC  
CCAGGTCAGCGGCCAGGGCGATTCCCTCCATGAGCATATCGCCAACCTCGCCGGCTCCCTGCCAT  
CAAGAAGGGCATCCTCCAGACCGTCAAGGTGTCGATGAGCTGGTCAAGGTCATGGGCCGCCATA  
AGCCTGAGAACATCGTCATCGAGATGGCCCGCGAGAACCAGACCACCCAGAAGGGCCAGAAGAA  
CTCCCGCGAGCGCATGAAGCGCATCGAGGAAGGCATCAAAGAGCTGGGCAGCCAAATCCTCAAAG  
AGCATCCTGTCGAGAACACCCAGCTCCAGAACGAGAAGCTCTACCTTACTACCTCCAGAACGGC  
CGGATATGTACGTCGATCAAGAGCTGGACATCAACCGCCTCTCCGATTACGATGTCGATCATATC  
GTCCCTCAGTCCTTCTGAAGGATGATTCCATCGATAACAAGGTCTCACCCGCTCCGATAAGAAC  
CGCGGCAAGTCCGATAACGTCCCTTCCGAAGAGGTCGTCAAGAAGATGAAGAACTACTGGCGCCA  
GCTCCTCAACGCCAAGCTCATCACCCAGCGCAAGTTCGATAACCTCACCAAGGCCGAGCGCGGTG  
GCCTCTCCGAGCTGGATAAAGGCCGGCTTCATCAAGCGCCAGCTCGTCGAAACCCGCCAGATCACC  
AAGCACGTCGCCAAATCCTCGATTCCCGCATGAACACCAAGTACGATGAGAACGATAAGTTCAT  
CCGCGAAGTCAAGGTCATCACCCCTCAAGTCCAAGCTCGTCAGCGATTTCCGCAAGGATTTCCAGTT  
CTACAAGGTCCGCGAGATCAACAACCTACCATCATGCCATGATGCCTACCTCAACGCCGTCGTCGG  
CACCGCCCTCATCAAGAAGTACCCCAAGCTCGAATCCGAGTTCGTCTACGGTGATTACAAGGTCTA  
CGATGTCCGCAAGATGATCGCCAAGTCCGAGCAAGAGATCGGCAAGGCTACCGCCAAGTACTTCT  
TCTACTCCAACATCATGAATTTCTTCAAGACCGAAATCACCCCTCGCCAACGGCGAAATCCGCAAGC  
GCCCTCTCATCGAGACTAACGGCGAGACTGGCGAGATCGTCTGGGATAAAGGGCCGCGATTTGCC  
ACCGTCCGCAAGGTCTCTCCATGCCTCAGGTCAACATCGTCAAGAAAACCGAGGTCCAGACCGG  
CGGCTTCTCAAAGAGTCCATCCTCCCAAGCGCAACTCCGATAAGCTGATCGCCCGAAGAAGG  
ATTGGGACCCTAAGAAGTACGGCGGCTTCGATTCCCTACCGTCGCCTACTCCGTCCTCGTCGTCG  
CCAAGGTCGAGAAGGGCAAGTCCAAGAAGCTCAAGTCCGTCAAAGAGCTGCTCGGCATCACTATT  
ATGGAACGCTCCAGCTTCGAGAAGAACCCTATCGATTTCTTGAGGCCAAGGGCTACAAAGAGGT

CAAGAAGGACCTCATCATCAAGCTCCCCAAGTACTCCCTGTTTCGAGCTTGAGAACGGCCGCAAGC  
GCATGCTCGCCTCCGCCGGTGAGCTTCAGAAGGGCAACGAGCTGGCCCTGCCTTCCAAGTACGTCA  
ACTTCCTCTACCTCGCCTCCCATTACGAGAAGCTCAAGGGTCCCCTGAGGATAACGAGCAGAAGC  
AGCTGTTTCGTCGAGCAGCATAAGCACTACCTCGATGAGATCATCGAGCAGATCAGCGAGTTCTCCA  
AGCGCGTCATCCTCGCCGATGCCAACCTCGATAAAGTCCTGTCCGCCTACAACAAGCACCGCGATA  
AGCCTATCCGCGAGCAGGCCGAGAACATCATCCATCTCTTACCCTCACCAACCTCGGTGCCCTG  
CCGCCTTCAAGTACTTCGATAACCACATCGATCGCAAGCGCTACACCTCCACCAAAGAGGTCCTGG  
ACGCCACCTCATCCATCAGTCCATCACCGGCCTCTACGAAACCCGCATCGATCTCTCCCAGCTCG  
GCGGCGACATGGTGAGCAAGGGCGAGGAGCTGTTACCAGGGTGGTGCCATCCTGGTCGAGCTGGACGGCGAC  
GTAAACGGCCACAAGTTCAGCGTGTCCGGCGAGGGCGAGGGCGATGCCACCTACGGCAAGCTGACCCTGAAGTTCA  
TCTGCACCACCGCAAGCTGCCCGTCCCTGGCCACCCTCGTACCACCTGACCTACGGCGTGAGTGCTTACGCC  
GCTACCCCGACCACATGAAGCAGCACGACTTCTTCAAGTCCGCCATGCCGAAGGCTACGTCCAGGAGCGCACCATCT  
TCTTCAAGGACGACGGCAACTACAAGACCCGCGCCGAGGTGAAGTTCGAGGGCGACACCCTGGTGAACCGCATCGA  
GCTGAAGGGCATCGACTTCAAGGAGGACGGCAACATCCTGGGGCACAAGCTGGAGTACAACAGCCACAAC  
GTCTATATCATGGCCGACAAGCAGAAGAACGGCATCAAGGTGAACTTCAAGATCCGCCACAACATCGAGGACGGCAG  
CGTGACGCTCGCCGACCACTACCAGCAGAACACCCCATCGGCGACGGCCCCGTGCTGCTGCCGACAACCACTACC  
TGAGCACCCAGTCCGCCCTGAGCAAAGACCCCAACGAGAAGCGCGATCACATGGTCTGCTGGAGTTCGTGACCGCC  
GCCGGGATCACTCTCGGCATGGACGAGCTGTACAAGCCTCCGAGGAAACGTGCCAAAACAGAAGATGAGT  
GATGAGGATCCACTTAAACGTTACTGAAATCATCAAACAGCTTGACGAATCTGGATATAAGATCGTTG  
GTGTTCGATGTCAGCTCCGGAGTTGAGACAAATGGTGTTCAGGATCTCGATAAGATAACGTTTCAATTTGT  
CCAAGCAGCAAAGAGTGCCTTCTAGTGATTTAATAGCTCCATGTCAACAAGAATAAAACGCGTTTTTC  
GGGTTTACCTCTTCCAGATAACAGCTCATCTGCAATGCATTAATGCATTGACTGCAACCTAGTAACGCC  
TTACAGGCTCCGGCGAAGAGAAGAATAGCTTAGCAGAGCTATTTTCAATTTTCGGGAGACGAGATCA  
AGCAGATCAACGGTCGTCAAGAGACCTACGAGACTGAGGAATCCGCTCTTGGCTCCACGCGACTAT  
ATATTTGTCTCTAATTGTAATTTGACATGCTCCTCTTCTTACTCTGATAGCTTACTATGAAAATTCCG  
TCACCAGCNCCTGGGTTTCGCAAAGATAATTGCATGTTTCTTCCCTTGAACCTCAAGCCTACAGGACA  
CACATTCATCGTAGGTATAAACCTCGAAATCANTTCCCTACTAAGATGGTATAACAATAGTAACCATGCA  
TGGTTGCCTAGTGAATGCTCCGTAACACCCAATACGCCGGCCGAAACTTTTTTACAACCTCTCCTATG  
AGTCGTTTACCCAGAATGCACAGGTACACTTGTTTAGAGG
