# Supplementary material for: Development of a genome-editing CRISPR/Cas9 system in thermophilic fungal Myceliophthora species and its application to hyper-cellulase production strain engineering
Source: PubMed Central journal article supplement (PMC5209885; doi:10.1186/s13068-016-0693-9), 2017-01-03
Supplement: 13068_2016_693_MOESM9_ESM.pdf [file 13068_2016_693_MOESM9_ESM.pdf]

**Additional file 3:** Nucleotide sequence of the sgRNA expression cassettes. Blue letters indicate the U6 promoter. Orange letters indicate the RNA polymerase III U6 snRNA gene. Red letters indicate the sgRNA scaffold. Green letters indicate the target sequence of *amdS*, *cre-1*, *res-1*, *ghl-1*, or *alp-1*, respectively.

>RNA polymerase III U6 snRNA gene

```
AGGATCGGTGGAGTGAAGTTCGGAATCGAGGTTTCGGCGATGGGTCGTAAGCATGGCGACTTCGAACTTACTTGC
ACTGGCAAAGCGTTGCCAGAACGGCGAGAAAAAGAAGGGTAAGCGATATTCGCGTCATGATGGACTGTTCTTTT
TGGAACAGTAGTTGTTGTGGGAAGACTATGTCACACTTGCCACCTGCAAGGCCAGGGTCGTGGTTCGAACGAG
ACCAGCCTCGGCGCTGCTGGGAGCTCAAGATGGGCACGTTTGATTTCGTTAGACGTCAACAAGGCTGGAGTTCC
TAGTGACAGCCAAAGGCACAGCCACATTAAGTGGCGCTTTATCTGTCCACTAAGGTTCAATTGTGGCTTTGAGC
CGCGCAGTGTGCAGTCGTGCATTGGCCACCTAGCTAGCAGTATTAAGATCCTCTTCTCTCCCGAGATCTTCCTC
CTCTCTTTTCTTTCTTTCTCCTCGCCCTTCGGGGCATTGGTCAATTTGAAACGATACAGAGAAGATTAGCA
TGGCCCTGCACTAAGGATGACACGCTACTCAAAGAGACGCTACCAATTTTTTT
```

>sgRNA-*amdS* expression cassette with U6 promoter

```
AGGATCGGTGGAGTGAAGTTCGGAATCGAGGTTTCGGCGATGGGTCGTAAGCATGGCGACTTCGAACTTACTTGC
ACTGGCAAAGCGTTGCCAGAACGGCGAGAAAAAGAAGGGTAAGCGATATTCGCGTCATGATGGACTGTTCTTTT
TGGAACAGTAGTTGTTGTGGGAAGACTATGTCACACTTGCCACCTGCAAGGCCAGGGTCGTGGTTCGAACGAG
ACCAGCCTCGGCGCTGCTGGGAGCTCAAGATGGGCACGTTTGATTTCGTTAGACGTCAACAAGGCTGGAGTTCC
TAGTGACAGCCAAAGGCACAGCCACATTAAGTGGCGCTTTATCTGTCCACTAAGGTTCAATTGTGGCTTTGAGC
CGCGCAGTGTGCAGTCGTGCATTGGCCACCTAGCTAGCAGTATTAAGATCCTCTTCTCTCCCGAGATCTTCCTC
CTCTCTTTTCTTTCTTTCTCCTCGGGAACAGCATGGAGGGTGTGTTTAGAGCTAGAAATAGCAAGTTAAATAA
GGCTAGTCCGTTATCAACTTGAAAAGTGGCACCGAGTCGGTGCTTTTTTT
```

>sgRNA-*cre-1* expression cassette with U6 promoter

```
AGGATCGGTGGAGTGAAGTTCGGAATCGAGGTTTCGGCGATGGGTCGTAAGCATGGCGACTTCGAACTTACTTGC
ACTGGCAAAGCGTTGCCAGAACGGCGAGAAAAAGAAGGGTAAGCGATATTCGCGTCATGATGGACTGTTCTTTT
TGGAACAGTAGTTGTTGTGGGAAGACTATGTCACACTTGCCACCTGCAAGGCCAGGGTCGTGGTTCGAACGAG
ACCAGCCTCGGCGCTGCTGGGAGCTCAAGATGGGCACGTTTGATTTCGTTAGACGTCAACAAGGCTGGAGTTCC
TAGTGACAGCCAAAGGCACAGCCACATTAAGTGGCGCTTTATCTGTCCACTAAGGTTCAATTGTGGCTTTGAGC
CGCGCAGTGTGCAGTCGTGCATTGGCCACCTAGCTAGCAGTATTAAGATCCTCTTCTCTCCCGAGATCTTCCTC
CTCTCTTTTCTTTCTTTCTCCTCGAACGCGCAAAGTCTGCAGGTTTAGAGCTAGAAATAGCAAGTTAAATAA
GGCTAGTCCGTTATCAACTTGAAAAGTGGCACCGAGTCGGTGCTTTTTTT
```

>sgRNA-*res-1* expression cassette with U6 promoter

```
AGGATCGGTGGAGTGAAGTTCGGAATCGAGGTTTCGGCGATGGGTCGTAAGCATGGCGACTTCGAACTTACTTGC
ACTGGCAAAGCGTTGCCAGAACGGCGAGAAAAAGAAGGGTAAGCGATATTCGCGTCATGATGGACTGTTCTTTT
TGGAACAGTAGTTGTTGTGGGAAGACTATGTCACACTTGCCACCTGCAAGGCCAGGGTCGTGGTTCGAACGAG
ACCAGCCTCGGCGCTGCTGGGAGCTCAAGATGGGCACGTTTGATTTCGTTAGACGTCAACAAGGCTGGAGTTCC
TAGTGACAGCCAAAGGCACAGCCACATTAAGTGGCGCTTTATCTGTCCACTAAGGTTCAATTGTGGCTTTGAGC
CGCGCAGTGTGCAGTCGTGCATTGGCCACCTAGCTAGCAGTATTAAGATCCTCTTCTCTCCCGAGATCTTCCTC
CTCTCTTTTCTTTCTTTCTCCTCGCCCTATGAGCCCTCGTACCGTTTTAGAGCTAGAAATAGCAAGTTAAATAA
GCTAGTCCGTTATCAACTTGAAAAGTGGCACCGAGTCGGTGCTTTTTTT
```

>sgRNA-*ghl-1* expression cassette with U6 promoter

AGGATCGGTGGAGTGAAGTTCGGAATCGAGGTTGCGCGATGGGTCGTAAGCATGGCGACTTCGAACTTACTTGC  
ACTGGCAAGCGTTGCCAGAACGGCGAGAAAAAGAAGGGTAAGCGATATTCGCGTCATGATGGACTGTTCTTT  
TGGAACAGTAGTTGTTGTGGGAAGACTATGTCACACTTGCCACCTGCAAGGCCAGGGTCGTGGTTCGAACGAG  
ACCAGCCTCGGCGCTGCTGGGAGCTCAAGATGGGCACGTTTGATTTCGTTAGACGTCAACAAGGCTGGAGTTCC  
TAGTGACAGCCAAAGGCACAGCCACATTAAGTGGCGCTTTATCTGTCCACTAAGGTTCAATTGTGGCTTTGAGC  
CGCGCAGTGTGCAGTCGTGCATTGGCCACCTAGCTAGCAGTATTAAGATCCTCTTCTCTCCCGAGATCTTCCTC  
CTCTTCTTTTCTTTCTTTCTCCTCGACACATTCTGCGCCATCCGTTTTAGAGCTAGAAAATAGCAAGTTAAAATAAG  
GCTAGTCCGTTATCAACTTGAAAAAGTGGCACCGAGTCGGTGCTTTTTTT

>sgRNA-*alp-1* expression cassette with U6 promoter

AGGATCGGTGGAGTGAAGTTCGGAATCGAGGTTGCGCGATGGGTCGTAAGCATGGCGACTTCGAACTTACTTGC  
ACTGGCAAGCGTTGCCAGAACGGCGAGAAAAAGAAGGGTAAGCGATATTCGCGTCATGATGGACTGTTCTTT  
TGGAACAGTAGTTGTTGTGGGAAGACTATGTCACACTTGCCACCTGCAAGGCCAGGGTCGTGGTTCGAACGAG  
ACCAGCCTCGGCGCTGCTGGGAGCTCAAGATGGGCACGTTTGATTTCGTTAGACGTCAACAAGGCTGGAGTTCC  
TAGTGACAGCCAAAGGCACAGCCACATTAAGTGGCGCTTTATCTGTCCACTAAGGTTCAATTGTGGCTTTGAGC  
CGCGCAGTGTGCAGTCGTGCATTGGCCACCTAGCTAGCAGTATTAAGATCCTCTTCTCTCCCGAGATCTTCCTC  
CTCTTCTTTTCTTTCTTTCTCCTCGTCTACCGCGGCAAGTTCAGTTTTAGAGCTAGAAAATAGCAAGTTAAAATAA  
GGCTAGTCCGTTATCAACTTGAAAAAGTGGCACCGAGTCGGTGCTTTTTTT
