# Supplementary material for: Development of a genome-editing CRISPR/Cas9 system in thermophilic fungal Myceliophthora species and its application to hyper-cellulase production strain engineering
Source: PubMed Central journal article supplement (PMC5209885; doi:10.1186/s13068-016-0693-9), 2017-01-03
Supplement: 13068_2016_693_MOESM10_ESM.pdf [file 13068_2016_693_MOESM10_ESM.pdf]

**Additional file 4:** Nucleotide sequences of the donor DNA fragments. Blue letters indicate the 5' flanking region of *cre-1*, *res-1*, *ghl-1*, or *alp-1*, respectively. Gray letters indicate the PtrpC-neo expression cassette. Purple letters indicate the 3' flanking region of *cre-1*, *res-1*, *ghl-1*, or *alp-1*, respectively.

> donor-*cre1*

```
ACCGGGTAAGGTACTCTGTAAGTTACGGTACCTCTGGAGCCGGTGCCGCACCCCACTATTT
TTTTTCTTTTTCCCCGAGATCCCCCTGGCATCAGACCCTCCTGGTCCCCCCCCCTGTTCCCT
CCTCACTGAATCGCTGCGTTCCCGAGCCACCTAAGCCCCGCTGTTCCACACCACATGC
CAGCACACCACACGCCCCTCCCCCTATGTACGCCCGCCGCGTCATTTAAAACGAGTGCCG
CATCCCCCAAGCAAACCTCGCCAACTTTTGTACTTCCCCATGCCACTTTGAGTTTCCCCA
ACATCAGCACCCCAGACCCCAGATAACAAAGTCAAATAAAAGGTTCCCATTGTCTCCCGAC
ACAGCTCAACACGCTGTGTACAGACGAGCAACCACCAAACACATATCGCTTCGATACTCGAC
CAAGAACGACGTGCCTGACATCAGTACCCCTCGTCCCACTCGAAGTTGGGCGGCTTGTT
GTTTTTCTCCGGTTGCGTGCTCCGCGTGCAACCAAGTTGAAAGAGTCCGGGAACAACATCA
GGCTGAGATCTGGTGTGGAGCAACTCCGCTTGGGAGGGTGGACATACGACGTTAACTGAT
ATTGAAGGAGCATTTTTTGGGCTTGGCTGGAGCTAGTGGAGGTCAACAATGAATGCCTATTT
TGGTTTAGTCGTCCAGGCGGTGAGCACAAAATTTGTGTCGTTTGACAAGATGGTTCATTTAG
GCAACTGGTCAGATCAGCCCCACTTGTAGCAGTAGCGGCGGCGCTCGAAGTGTGACTCTTA
TTAGCAGACAGGAACGAGGACATTATTATCATCTGCTGCTTGGTGCACGATAACTTGGTGCG
TTTGTCAAGCAAGGTAAGTGGACGACCCGGTCATACCTTCTTAAGTTCGCCCTTCTCCCTT
TATTTAGATTCAATCTGACTTACCTATTCTACCCAAGCATCCAAATGATTGAACAAGATGGA
TTGCACGCAGGTTCTCCGGCCGCTTGGGTGGAGAGGCTATTCGGCTATGACTGGGCACAAC
AGACAATCGGCTGCTCTGATGCCGCCGTGTTCCGGCTGTCAGCGCAGGGGCGCCCGGTTCT
TTTTGTCAAGACCGACCTGTCCGGTGCCCTGAATGAACTGCAAGACGAGGCAGCGCGGCT
ATCGTGGCTGGCCACGACGGGCGTTCCCTTGCGCAGCTGTGCTCGACGTTGTCACTGAAGCG
GGAAGGGACTGGCTGCTATTGGGCGAAGTGCCGGGGCAGGATCTCCTGTCACTCACCTTG
CTCCTGCCGAGAAAGTATCCATCATGGCTGATGCAATGCGGCGGCTGCATACGCTTGATCCG
GCTACCTGCCATTCGACCACCAAGCGAAACATCGCATCGAGCGAGCACGTA CTCCGATGG
AAGCCGGTCTTGTCGATCAGGATGATCTGGACGAAGAGCATCAGGGGCTCGCGCCAGCCG
AACTGTTTCGCCAGGCTCAAGGCGAGCATGCCGACGGCGAGGATCTCGTCGTGACCCATG
GCGATGCCTGCTTGCCGAATATCATGGTGGAAAATGGCCGCTTTTCTGGATTCATCGACTGT
GGCCGGCTGGGTGTGGCGGACCGCTATCAGGACATAGCGTTGGCTACCCGTGATATTGCTG
AAGAGCTTGGCGGCGAATGGGCTGACCGCTTCCCTCGTGCTTTACGGTATCGCCGCTCCCGA
TTCGCAGCGCATCGCCTTCTATCGCCTTCTTGACGAGTTCTTCTGAAGTTCCCCGGGTGTAG
CAAACGCTTCTCGAGGTCCGACGAGCTCACCCGGCACTCGAGGATACACAACAATCCCAA
CTCGCGGAGAGGAAACAAGGGCCATCATCAGCACGCCGCCATGATCCAGAGGATGCAGCA
CGACGCCATGGACCCGCCACCGGGGCCAAGATGATCCGCTCGGCGCCCCCACGGCATTG
TCTTACCCAACGTGTGCCTCCTCACTACAGCTCCTATCCCATGAATCTTCCCCGCCGCT
CAGTCTCGGCCCGTACAACCGCGGTGCCTTGAGCAGCCAGAGTGGTTCCGGATGTGGCAATG
TTGGCGAGGACGGCCACCGGGACACCACCCCGAGTCAGTCTCATTACCCGCCGTCGAGA
CAGACCCGTA CTACGGCGGGTCGCTCCACTCGTCCGGAACCCGCTGCCCGGTCTGGGCG
CCTACCACATGTCGCGGTGCGACTCGAACGATGACCACGACGACCACTATGCGCAAAGTTA
CAGGCAGCCGAAGAGGTGAGGCCCAACTCCCCAACTCGACGGCTCCTTCTCTCTACC
```

TTTTCCACAACCTCGTTGTCCCCGACGCCGGACCACACCCCA

> donor-res-1

AACCAACCCTCCTTCGACTTTCGGCCGCCAAAGCGCCAGGATTCGTTGGTGAGTCGTAC  
AGATCCCTAGGTCCTCTCCTTCTCGTCCTTCTCCGCCTCCGCCAGTCACGGCCGACCAGCC  
CGCCGTGGCTCTCTCTTCTTCCGAGTCTTGCGCTTCCGAGTCCACGGTCGTGCGCCGCC  
CAAGCCCTCCAGTCCCGGCCTGGCGGTCGACACACGCCTTGCGCGGCAGACGACCACCAT  
GTCTGCATCCCTGGCGTCCACCCCTGCCTCTTCTCTTCTGCGCTCCTCGTGACGCCGCCA  
CGACCTCTGCTTCTCCTTTTCTTCTTCTTCTTCTTCTTCTTCTTCTTCTTCTTCTTCTC  
GCCGCCTGGAGCAGCCCGCCGCGGCCTGCGGCTCGCCCTCGCGCACGGGCACCCCAAC  
GCCCGCATGCTCTTCTTCTTCTTCTTCTTCTTCTTCTTCTTCTTCTTCTTCTTCTTCTC  
TGTTGGTTTCCTCTCTCGCGATTGCGAGATCCACCGCACGACCGGGTTTTGCTGACATGAA  
AAACCCTCGCGCCTACAGATCCCTCCTTAATTCACCCGGACGTCGACGTTAACTGATATTGA  
AGGAGCATTTTTTGGGCTTGGCTGGAGCTAGTGGAGGTCAACAATGAATGCCTATTTTTGGT  
TAGTCGTCCAGGCGGTGAGCACAAAATTTGTGTCGTTTGACAAGATGGTTCATTTAGGCAA  
CTGGTCAGATCAGCCCACTTGTAGCAGTAGCGGCGGCTCGAAGTGTGACTCTTATTAG  
CAGACAGGAACGAGGACATTATTATCATCTGCTGCTTGGTGCACGATAACTTGGTGCCTT  
TCAAGCAAGGTAAGTGGACGACCCGGTCATACCTTCTTAAAGTTCGCCCTTCTCCTTTATT  
TCAGATTCAATCTGACTTACCTATTCTACCCAAGCATCCAAATGATTGAACAAGATGGATTG  
CACGCAGGTTCTCCGGCCGCTTGGGTGGAGAGGCTATTGCGCTATGACTGGGCACAACAGA  
CAATCGGCTGCTCTGATGCCGCCGTGTTCCGGCTGTCAGCGCAGGGGCGCCCGGTTCTTTT  
TGTCAAGACCGACCTGTCCGGTGCCTGAATGAACTGCAAGACGAGGCAGCGCGGCTATC  
GTGGCTGGCCACGACGGGCGTTCCTTGCGCAGCTGTGCTCGACGTTGTCACTGAAGCGGG  
AAGGGACTGGCTGCTATTGGGCGAAGTGCCGGGGCAGGATCTCCTGTCATCTCACCTTGCT  
CCTGCCGAGAAAGTATCCATCATGGCTGATGCAATGCGGCGGCTGCATACGCTTGATCCGGC  
TACCTGCCATTCGACCACCAAGCGAAACATCGCATCGAGCGAGCACGTAICTGGATGGAA  
GCCGGTCTTGTGATCAGGATGATCTGGACGAAGAGCATCAGGGGCTCGCGCCAGCCGAA  
CTGTTCCGCAAGGCTCAAGGCGAGCATGCCGACGGCGAGGATCTCGTCTGACCCATGGCG  
ATGCCTGCTTGCCGAATATCATGGTGGAAAATGGCCGCTTTTCTGGATTCATCGACTGTGGC  
CGGCTGGGTGTGGCGGACCGCTATCAGGACATAGCGTTGGCTACCCGTGATATTGCTGAAG  
AGCTTGGCGGCGAATGGGCTGACCGCTTCTCGTGCTTTACGGTATCGCCGCTCCCGATTCT  
CAGCGCATCGCCTTCTATCGCCTTCTTGACGAGTCTTCTGAGTCTTGTCTCGTACCAGTCC  
CACTTCTCTGGCGAGCAGCCATTCGGTGGCGACGAGTCGAGGGACAAGCAGCGCTGCCCG  
CACCAGGACTGCGGCAAGACCTTCAAGGACCTCAAGGCTCATATGCTCACCCACCAGAAC  
GAGCGGCCCGAGAAGTGCCCATCACGACGTGCGAGTATCACGTAAAAGGCTTCGCGAGA  
AAGTGAGTAGTAATATAGTAGTGCCTGTGTGCCCGGCTCTTCAAGAACCCCTGAACACAA  
CAACAAACACAAGGCTCAGAGCGCTAACCGTGCCAATCTTGATCAGGTACGACAAGAACC  
GCCACACGCTCACCCACTACAAGGGCACCATGGTGTGCGGCTTCTGCCCGGGTTCGGGCTC  
CGCGGCGGAGAAGTCGTTCAACCGGGCCGATGTGTTCAAGAGGCACTTGACGGCCGTGCA  
CGGAGTCGAGCAGACGCCTCCCAACGGTCGGAAGAAGACGGCCGGCGGCAGCAGCAGCG  
GGAACGACGCGAAGCTCACGGGCTATGCGCCCCGACGCGACGGGCAAGTGCTCGACGTGCT  
CGCAAACCTTCAGCAACGCACAAGACTTTTACGAGCACC

> donor-gh1-1

ACTATCAACAGCCCCCGGATTGCTGACCGTTGGCCATTCACGGCCCTTCGTTTGCCAGTCC  
TTCGCCAGGGTCAACCTACCCCGCGGTGGGGGGTTGTTCTTGGATCCTTGTCGAGGCCCG  
GCTGCCACATCGCCACGCTGTGCACTCAGCGTAACACAGGGCCCGGATCTCTCAAGCGA  
TGCCAGCTTTTTTTCATCGGTGTTGACGGTCCGAAACTCGCGGGAGAGATGGGGGCAGAT  
CATGGCGGGAAACGGCCGTGATGGTTCCTGGATATAAAGGAGATCAGGCCTTCCTCCTCG  
GCTCATTGGGGCCTACTAGCACATCATATCCGTCTTCCATCCCTCCTCAGAACTTCCTTCCC  
CTTCTCCTATCCACCTTTCCTTACTCACACAGACAATCGTCCATCGTCCACCATGTCTCTT  
CCCAAGGACTTCAAGTGGGGCTTCGCCACCGCCTCGTAAGTTCAAGGACCCGGGCTTTTCG  
ATCAAGCTCACAGAACCCTTGGCTGACTGTGTGTTCCCTTTCTCTCCTCACCCACAGGT  
ACCAGATTGAGGGCTCCGTCAACGAGGATGGCCGTGGCCCTCCACGACGTTAACTGATAT  
TGAAGGAGCATTTTTTGGGCTTGGCTGGAGCTAGTGGAGGTCAACAATGAATGCCTATTTTG  
GTTTAGTCGTCCAGGCGGTGAGCACAAAATTTGTGTCGTTTGACAAGATGGTTCATTTAGGC  
AACTGGTCAGATCAGCCCCACTTGTAGCAGTAGCGGCGGCGCTCGAAGTGTGACTCTTATT  
AGCAGACAGGAACGAGGACATTATTATCATCTGCTGCTTGGTGCACGATAACTTGGTGC GTT  
TGTCAAGCAAGGTAAGTGGACGACCCGGTCATACCTTCTTAAGTTCGCCCTTCTCCTTTA  
TTTCAGATTCAATCTGACTTACCTATTCTACCCAAGCATCCAAATGATTGAACAAGATGGATT  
GCACGCAGGTTCTCCGGCCGCTTGGGTGGAGAGGCTATTCGGCTATGACTGGGCACAACAG  
ACAATCGGCTGCTCTGATGCCGCCGTGTTCCGGCTGTCAGCGCAGGGGCGCCCGGTTCTTT  
TTGTCAAGACCGACCTGTCCGGTGCCCTGAATGAACTGCAAGACGAGGCAGCGCGGCTAT  
CGTGGCTGGCCACGACGGGCGTTCCTTGCAGCTGTGCTCGACGTTGTCACTGAAGCGG  
GAAGGGACTGGCTGCTATTGGGCGAAGTGCCGGGGCAGGATCTCCTGTCTCACCTTGC  
TCCTGCCGAGAAAGTATCCATCATGGCTGATGCAATGCGGCGGCTGCATACGCTTGATCCGG  
CTACCTGCCCATTCGACCACCAAGCGAAACATCGCATCGAGCGAGCACGTACTCGGATGGA  
AGCCGGTCTTGTGCATCAGGATGATCTGGACGAAGAGCATCAGGGGCTCGCGCCAGCCGA  
ACTGTTCCGCCAGGCTCAAGGCGAGCATGCCCGACGGCGAGGATCTCGTCTGACCCATGGC  
GATGCCTGCTTGCCGAATATCATGGTGGAAAATGGCCGCTTTTCTGGATTATCGACTGTGG  
CCGGCTGGGTGTGGCGGACCGCTATCAGGACATAGCGTTGGCTACCCGTGATATTGCTGAA  
GAGCTTGGCGGCGAATGGGCTGACCGCTTCCCTCGTGCTTTACGGTATCGCCGCTCCCGATT  
GCAGCGCATCGCCTTCTATCGCCTTCTTGACGAGTTCTTCTGATGTTCAAGGCCATCCCCAA  
GTGCAAGCACTGGATCACCTTCAACGAGCCGTGGTGCACGTCCATCCTGGGCTACAACACG  
GGTACTTCGCGCCCGGCCGACGTCGGACCGCAGCAAGTCGCCCGTCGGCGACAGCGG  
CGCGAGCCGTGGATCGTCGGCCACAACATCCTCATCGCGCACGGGAGGGCCGTCAAGGCG  
TACCGCGAGGACTTCAAGCCACGCAGGGCGGCGAGATCGGCATCACGCTCAACGGCGAC  
GCCACGCTCCCCTGGGACCCGGAGGACCCGGCCGACGTCGAGGCGTGCAGCCGCAAGATC  
GAGTTCGCCATCTCGTGGTTCGCCGACCCATCTACTTTGGCGAGTACCCGGCGTGCATGCG  
CAAGCAGCTGGGCGACCGCTGCCAAGTTACGGCCGAGGAGGTGGCGCTCGTCAAGGG  
CTCCAACGACTTCTACGGCATGAACCACTACACGGCCAACTACATCAAGCACAGAAGGG  
CGTGCCGCCCAGGACGACTTCTGGGCAACCTCGAGACGCTTCTTACAACAAGAACGC  
CGACTGCATCGGGCCCGAGACGCAGTCCTTCTGGCTGC

> donor-*alp-1*

CCTTCCTAGTCCTCGCAGCAAACCTCGAGCTGCTATCAGATTCCCGGGAAGCGGCCTGCCACAGCCGCT  
CAACCCGGCCTTGGCATGGCCAGGCGGCCCTTTCATGTGTCGAAAGCGGCAGGTATCAGCACAGATC  
TCGAGGGTGGGAAAGAGAGGGGGGGGAGGGGCGATGCTGGGGCGATGCTGCTTGGAGCCGCATCCG

GGGAGGGGGCCCTGCTGTTTCATCCATATCCAGGATGATGCGAGATTGAAGCAAGATAAATAACACGGC  
TTCCCCCTCCCCTTTCGATCCGGACCAGACCATCGTCTCCAACACCCCAAAGTCGATCCGACAAGTCC  
CAATCCACCCCGCCCGCCCTCCCTCCGTCGCCGTCCCGGTCTCCGATTCGTCGAAGATGCACTTCTC  
CACCGCTCTCTGGCCTTCTGCCC GCCCTCGCGGCCCTACTGCCGAGACCCTCGACAAGCGCG  
CCCCGATCCTGACTGCTCGCGCTGGCCAGGTTCGTCGCCGGCAAGTACATCATCAAGCTCCGCGACGGA  
GCCAGCGACGATGTCCTTGAGGCCGCCATCGGCAAGCTCCGCTCCAAGGCCGACCACCGACGTAAAC  
TGATATTGAAGGAGCATTTTTTGGGCTTGGCTGGAGCTAGTGGAGGTCAACAATGAATGCCTATTTTGG  
TTTAGTCGTCCAGGCGGTGAGCACAAAATTTGTGTCGTTTGACAAGATGGTTCATTTAGGCAACTGGT  
CAGATCAGCCCCACTTGTAGCAGTAGCGGCGGCGCTCGAAGTGTGACTCTTATTAGCAGACAGGAACG  
AGGACATTATTATCATCTGCTGCTTGGTGCACGATAACTTGGTGCCTTTGTCAAGCAAGGTAAGTGGAC  
GACCCGGTCATACCTTCTTAAGTTCGCCCTTCCCTCCCTTTATTTAGATTCAATCTGACTTACCTATTCTA  
CCCAAGCATCCAAATGATTGAACAAGATGGATTGCACGCAGGTTCTCCGGCCGCTTGGGTGGAGAGG  
CTATTCGGCTATGACTGGGCACAACAGACAATCGGCTGCTCTGATGCCGCCGTGTTCCGGCTGTCAGC  
GCAGGGGCGCCCGGTTCTTTTTGTCAAGACCGACCTGTCCGGTGCCCTGAATGAACTGCAAGACGAG  
GCAGCGCGGCTATCGTGGCTGGCCACGACGGGCGTTCCTTGCGCAGCTGTGCTCGACGTTGTACTGA  
AGCGGGAAGGGACTGGCTGCTATTGGGCGAAGTGCCGGGGCAGGATCTCCTGTCTACCTTGCTC  
CTGCCGAGAAAAGTATCCATCATGGCTGATGCAATGCGGCGGCTGCATACGCTTGATCCGGCTACCTGCC  
CATTTCGACCACCAAGCGAAACATCGCATCGAGCGAGCACGTA CTGGATGGAAGCCGGTCTTGTGCAT  
CAGGATGATCTGGACGAAGAGCATCAGGGGCTCGCGCCAGCCGAACTGTTCCGCCAGGCTCAAGGCCGA  
GCATGCCCCGACGGCGAGGATCTCGTCGTGACCCATGGCGATGCCTGCTTGCCGAATATCATGGTGGAA  
AATGGCCGCTTTTTCTGGATTATCGACTGTGGCCGGCTGGGTGTGGCGGACCGCTATCAGGACATAGC  
GTTGGCTACCCGTGATATTGCTGAAGAGCTTGGCGGCGAATGGGCTGACCGCTTCTCCTGCTTTACG  
GTATCGCCGCTCCCGATTTCGACGCGCATCGCCTTCTATCGCCTTCTTGACGAGTCTTCTGAGGGCTCCA  
CCACCTACACCTACGACACCAGCGCCGGCGAGGGCACCTGTGCCTATGTGATCGACACGGGCATCTAC  
ACTAGCCACTCCGTATGTCTCGCGGTTACCTCCCCTTTCGGAAGAAGGGGCATCCATATGCTGACCCCT  
CCTGATCACAGGACTTCGGCGGCCGTGCCACTTTCGCCGCCAACTTCGTCGACAGCTCTAACACCGAT  
GGCAACGGCCACGGCACCCACGTCGCCGGCACCATCGGCGGCACCACGTACGGTGTGGCCAAGAAG  
ACCAAGCTCTACGCCGTCAAGGTTCTCGGCTCCGACGGCTCTGGCACCACGTATGCCTCGCACCCGCG  
CACCCGCACACCCGCCCGGCGTTATCTTCTGACTGACATTCTCTTTCTCCTCTCTAGTTCTGGTGTG  
ATTGCTGGCATCAACTTCGTCGCTGACGACGCGCCAAAGCGCAGCTGCCCCAAGGGCGTCGTCGCCA  
ACATGTCGCTCGGCGGTAGCTACTCGGCTCCATCAACAACGCCGCCGCCGCCCTCGTCAGGTCGGGC  
GTCTTCTGGCCGTCGCCGCCGGCAACGAGAACCAGAACGCCGCCAACTC
